# Supplementary material for: TEX264 coordinates p97- and SPRTN-mediated resolution of topoisomerase 1-DNA adducts
Source: PubMed Central journal article supplement (PMC7062751; doi:10.1038/s41467-020-15000-w), 2020-03-09
Supplement: 41467_2020_15000_MOESM1_ESM.pdf [file 41467_2020_15000_MOESM1_ESM.pdf]

Supplementary information for

**TEX264 coordinates p97- and SPRTN-mediated resolution of  
topoisomerase 1-DNA adducts**

Fielden, Wiseman et al.

**A**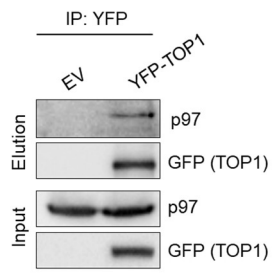**B**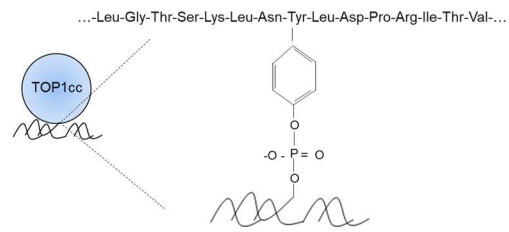**C**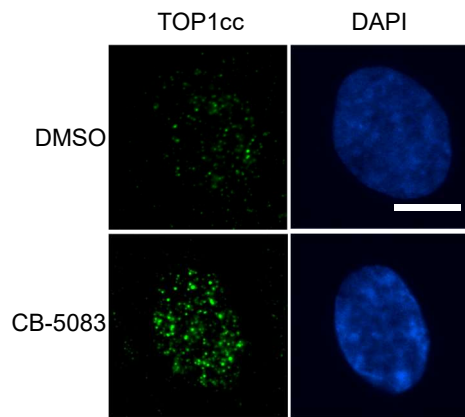**D**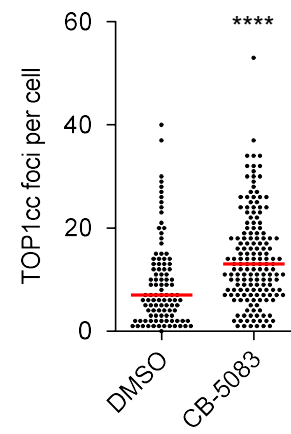

Supplementary Figure 1

### **Supplementary Figure 1: The p97 ATPase Promotes TOP1cc Repair**

**A**, Co-immunoprecipitation of p97 with chromatin-bound YFP-TOP1. **B**, Schematic diagram of the antigen recognised by the TOP1cc-specific antibody. **C**, Representative nuclei of RPE-1 cells, treated with either DMSO or the p97 inhibitor, CB-5083 (10  $\mu$ M), for 6 hours, then immunostained with the TOP1cc-specific antibody. Scale bar, 10  $\mu$ m. **D**, Quantification of C. Red line indicates median values. Quantification of two experiments. Significance determined by Mann–Whitney test. Source data are available online.

**A**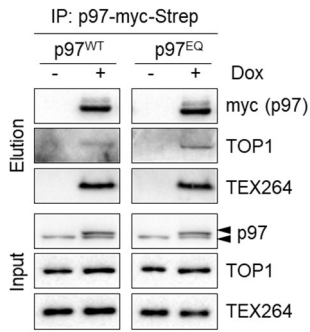**B**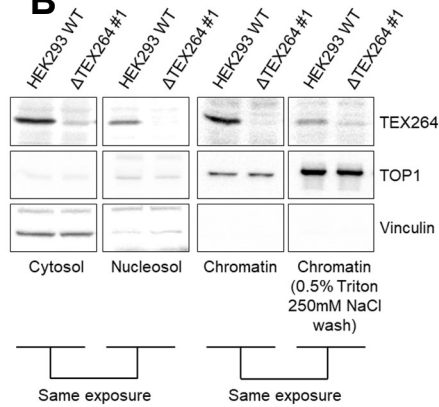**C**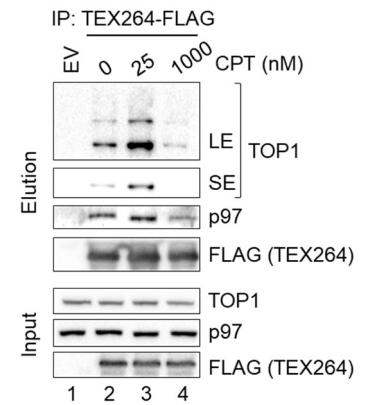**D**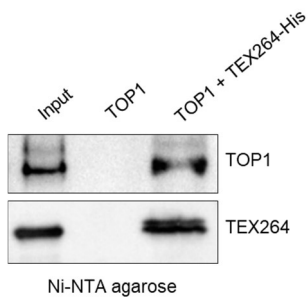**E**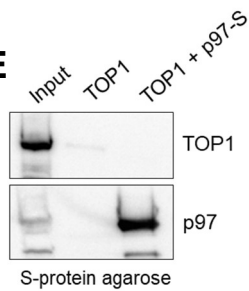**F**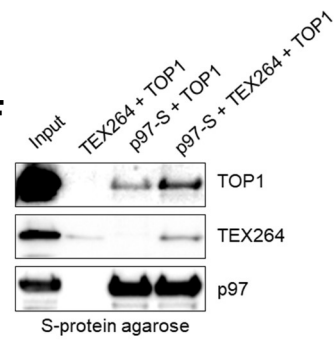**G**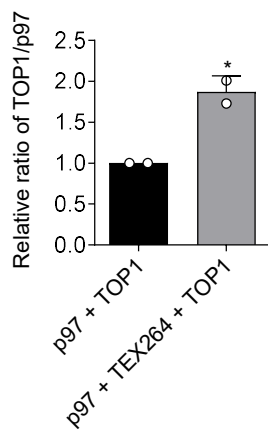**H**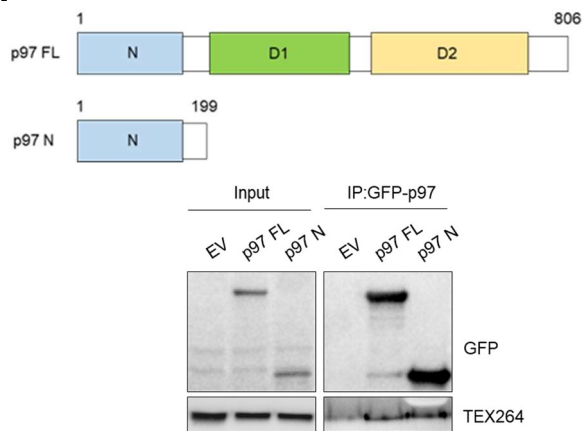**Supplementary Figure 2**

## Supplementary Figure 2: TEX264 Binds p97 and TOP1 *in vitro* and *in vivo*

**A**, Immunoblots of anti-Strep-tag immunoprecipitates prepared from doxycycline (Dox)-inducible HEK293 cells expressing p97<sup>WT</sup>- or EQ-myc-Strep. Arrowheads indicate endogenous p97 (lower band) and p97-myc-Strep (upper band). **B**, Cytosolic, nuclear soluble (nucleosol), and chromatin fractions prepared from WT and TEX264-knockout ( $\Delta$ TEX264) HEK293 cells immunoblotted with the indicated antibodies. Chromatin was washed with 0.5% Triton X-100 and 250 mM NaCl to separate loosely-bound and tightly-bound protein fractions. **C**, Analysis of TEX264-FLAG immunoprecipitates prepared from HEK293 cells treated with the indicated doses of CPT for 1 hour. LE, long exposure; SE, short exposure. **D**, *In vitro* interaction (pull-down) assay using recombinant TOP1 incubated with or without His-tagged TEX264 (amino acids 34-313). **E**, *In vitro* interaction assay using recombinant TOP1 incubated with or without S-tagged p97. **F**, Pull-down of recombinant p97-S after incubation with TOP1, with or without TEX264. **G**, Quantification of F (error bars represent mean  $\pm$  SD;  $n = 2$ ;  $*P < 0.05$ ; Student's t-test). **H**, Above: schematic diagrams of p97 proteins used below. Below: immunoblots of anti-GFP immunoprecipitates prepared from HEK293 cells expressing the indicated GFP-tagged p97 constructs. Source data are available online.

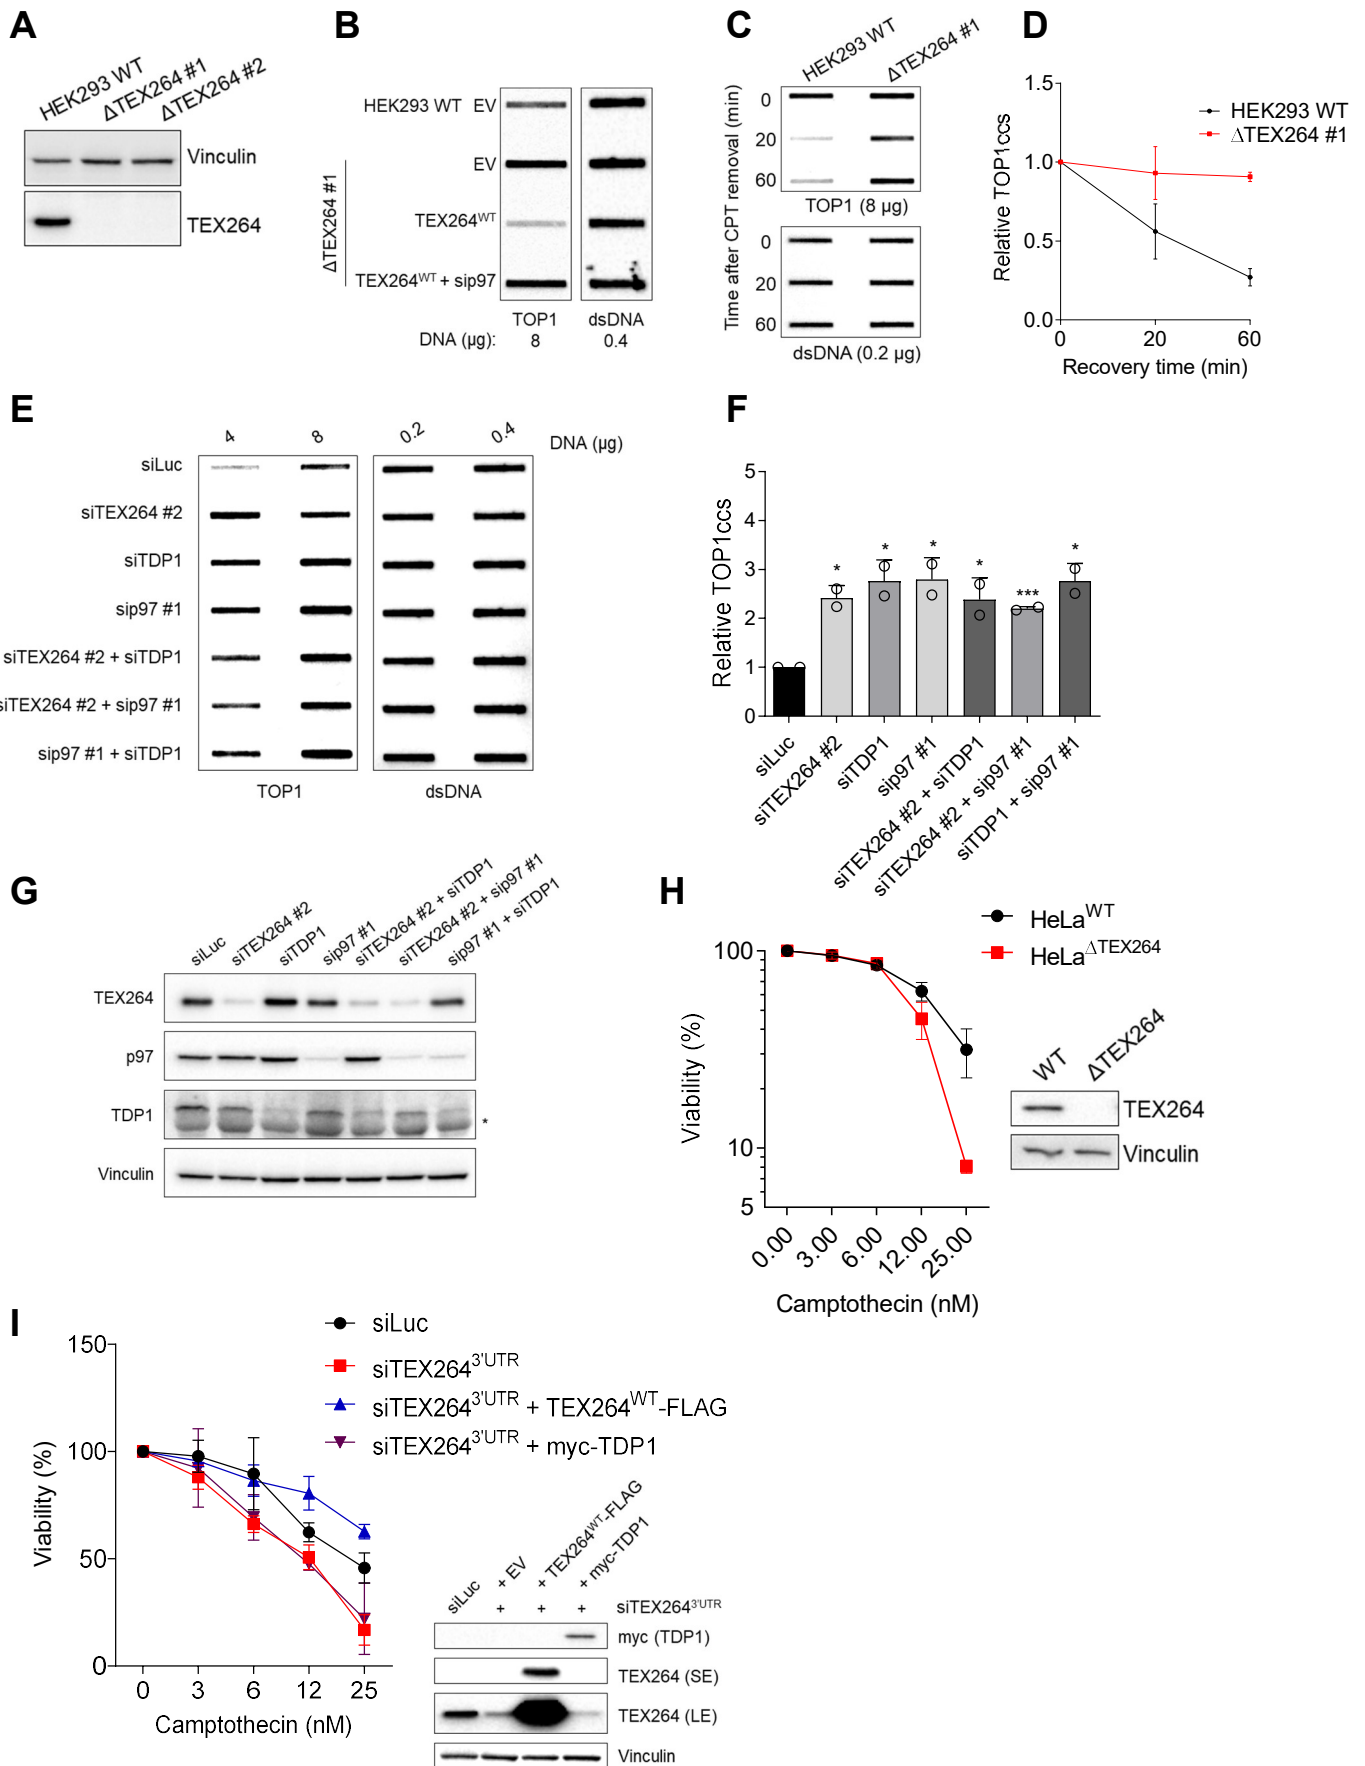

**Supplementary Figure 3**

### Supplementary Figure 3: TEX264 Counteracts TOP1ccs

**A**, Immunoblot analysis of TEX264 expression in HEK293 WT and  $\Delta$ TEX264 cells. **B**, RADAR analysis of TOP1ccs in WT and  $\Delta$ TEX264 HEK293 cells treated with the indicated siRNAs and transfected with empty vector (EV) or cDNA encoding TEX264<sup>WT</sup>-SSH. **C**, TOP1ccs isolated by RADAR from WT or  $\Delta$ TEX264 HEK293 cells treated for 1 hour with CPT (50 nM), then released into CPT-free media for 20 or 60 minutes. **D**, Quantification of C (error bars represent mean  $\pm$  SEM;  $n = 3$ ). **E**, RADAR analysis of TOP1ccs in HEK293 cells treated with the indicated siRNAs. **F**, Quantification of E (error bars represent mean  $\pm$  SD;  $n = 2$ ; \* $P < 0.05$ ; \*\*\* $P < 0.001$ ; Student's t-test). **G**, Immunoblots to confirm depletions in E. The asterisk indicates an unspecific band. **H**, Colony forming assay to assess the survival of WT or  $\Delta$ TEX264 HeLa cells after CPT treatment. Cells were treated for 24 hours with the indicated doses of CPT, then allowed to recover for 7 days (error bars represent mean  $\pm$  SEM;  $n = 3$ ). Viability is expressed as a percentage of the corresponding untreated samples. Right: corresponding immunoblots. **I**, Colony forming assay to assess the survival of HeLa cells after CPT treatment (performed as described for H). Right: control immunoblots (LE & SE denote long & short exposure, respectively). Source data are available online.

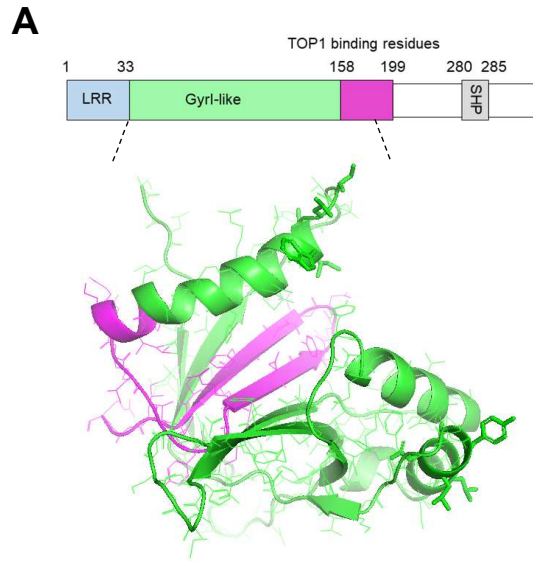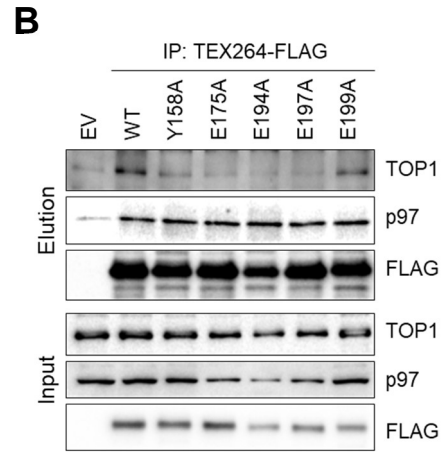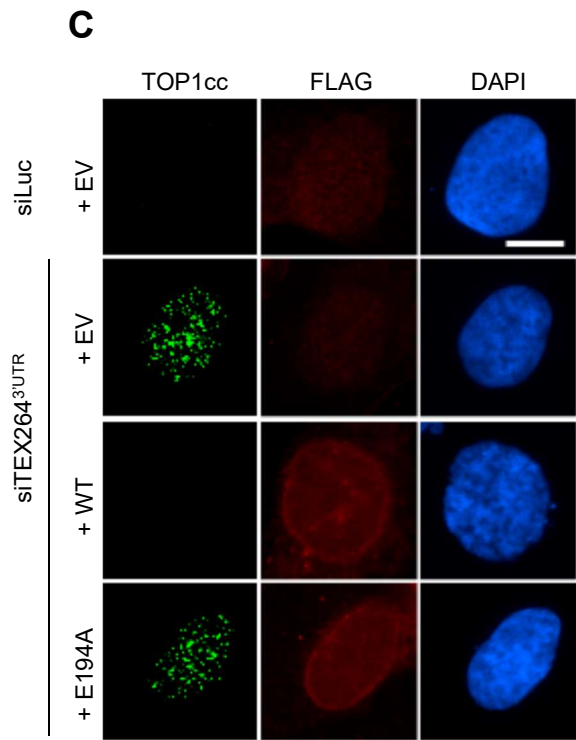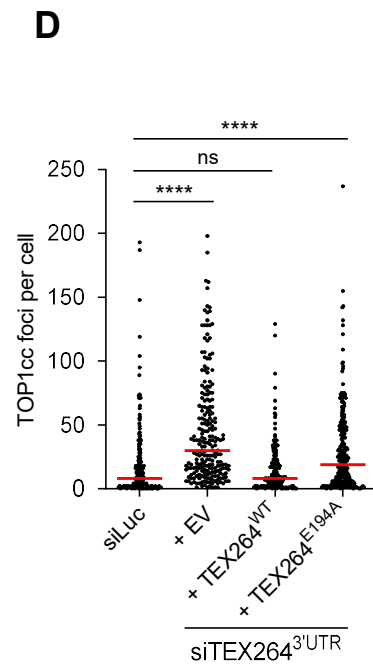

Supplementary Figure 4



## Supplementary Figure 4: The Gyrl-like Domain of TEX264 is Important for TOP1cc Repair

**A**, Above: schematic diagram of the TEX264 protein with the residues implicated in TOP1 binding indicated in pink. Below: structural model of the Gyrl-like domain of TEX264 generated using Phyre2. Residues 158-184 are highlighted in pink. Residues 185-199 are outside of the model, as these residues are unique to TEX264. **B**, Immunoblots of FLAG immunoprecipitates prepared from  $\Delta$ TEX264 HEK293 cells transiently expressing the indicated versions of FLAG-tagged TEX264. **C**, Representative images of U2OS cells treated with siLuc or siTEX264<sup>3'UTR</sup>, transfected with the indicated FLAG-tagged variants of TEX264, and immunostained with TOP1cc (green) and FLAG (red) antibodies. Scale bar, 10  $\mu$ m. **D**, Quantification of experiments represented in C. Red line indicates median. Data are representative of 3 independent experiments. Statistical analysis was performed using Kruskal-Wallis ANOVA with multiple comparisons, with Dunn's post-test. Source data are available online.

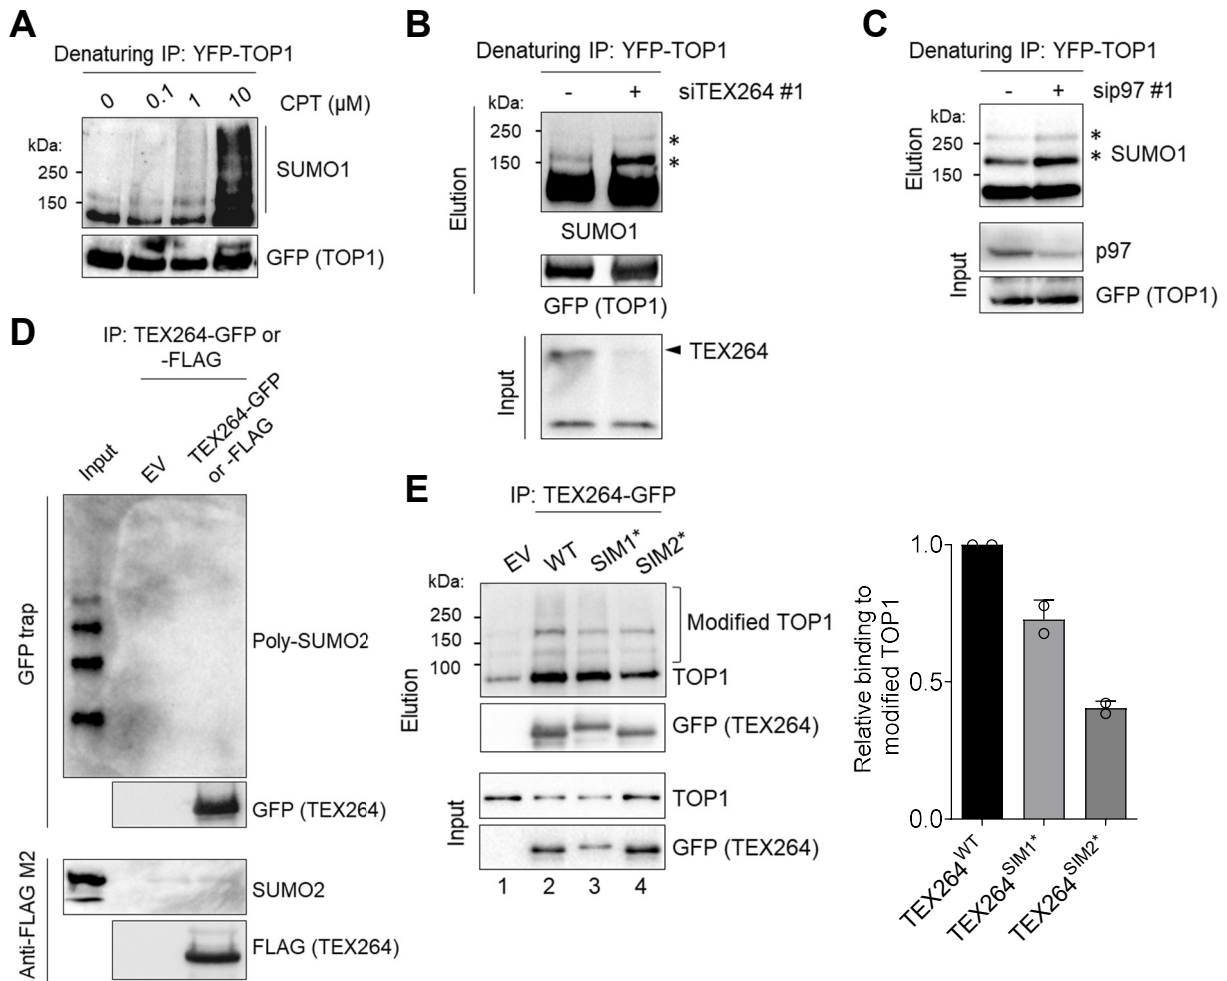

Supplementary Figure 5

### **Supplementary Figure 5: TEX264 Binds SUMO1-modified TOP1**

**A**, Immunoblots of SUMO1-modified YFP-tagged TOP1. YFP-TOP1 was immunoprecipitated under denaturing conditions from HEK293 cells treated with the indicated doses of CPT for 1 hour. **B**, Immunoblot of SUMO1-modified TOP1 after immunoprecipitation of YFP-TOP1 under denaturing conditions from HEK293 cells treated with the indicated siRNA. Asterisks indicate SUMO1-modified species of YFP-TOP1. **C**, Same as B. **D**,  $\Delta$ TEX264 HEK293 cells transfected with EV or cDNA encoding either GFP- or FLAG-tagged TEX264 alleles were subjected to either anti-FLAG or -GFP IP under stringent conditions. Beads were incubated with either free, non-conjugated SUMO2 or poly-SUMO2 chains then immunoblotted with GFP, FLAG, or SUMO2/3 antibodies. **E**, Left panel: immunoblot analysis of GFP immunoprecipitates prepared from  $\Delta$ TEX264 HEK293 cells transiently expressing the indicated GFP-tagged versions of TEX264. Right panel: corresponding quantification (mean  $\pm$  SD;  $n = 2$ ). Source data are available online.

**A**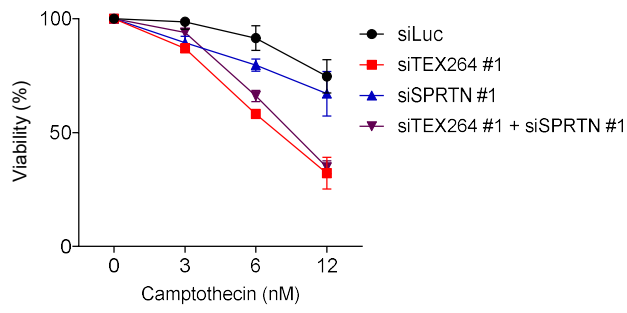**B**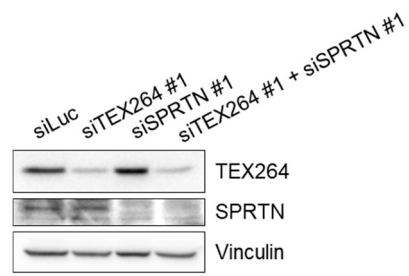**C**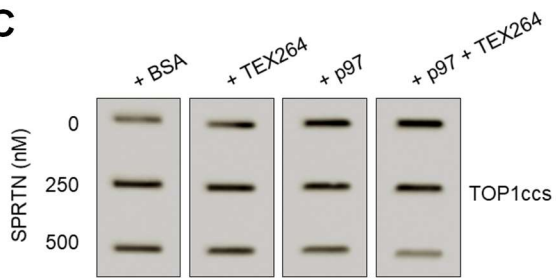**D**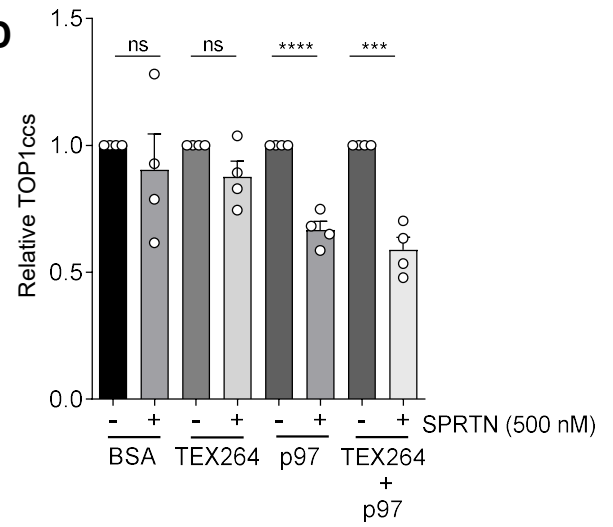**Supplementary Figure 6**

**Supplementary Figure 6: TEX264 Cooperates with the Metalloprotease SPRTN in TOP1cc Repair**

**A**, Colony forming assay to assess the survival of HeLa cells transfected with the indicated siRNAs following a 24 hour treatment with the indicated doses of CPT (error bars represent mean  $\pm$  SD;  $n = 2$ ). **B**, Immunoblots to confirm efficacy of depletions in A. **C**, *In vitro* TOP1cc repair assay. Representative images of each condition are shown. TOP1ccs were purified from FlpIn T-REx HEK293 cells inducibly expressing TDP1-targetting miRNAs and treated with 10  $\mu$ M MG132 for 1 hour and 14  $\mu$ M CPT for 30 minutes. TOP1ccs were incubated with the indicated purified proteins, slot-blotted onto a nitrocellulose membrane and probed with a TOP1cc-specific antibody. **D**, Quantification of C (mean  $\pm$  SEM;  $n = 4$ ; ns, not significant; \*\*\* $P < 0.001$ ; \*\*\*\* $P < 0.0001$ ; Student's t-test). TOP1cc levels were normalised to the corresponding control sample (i.e. 0 nM SPRTN/reaction) in each condition. Source data are available online.

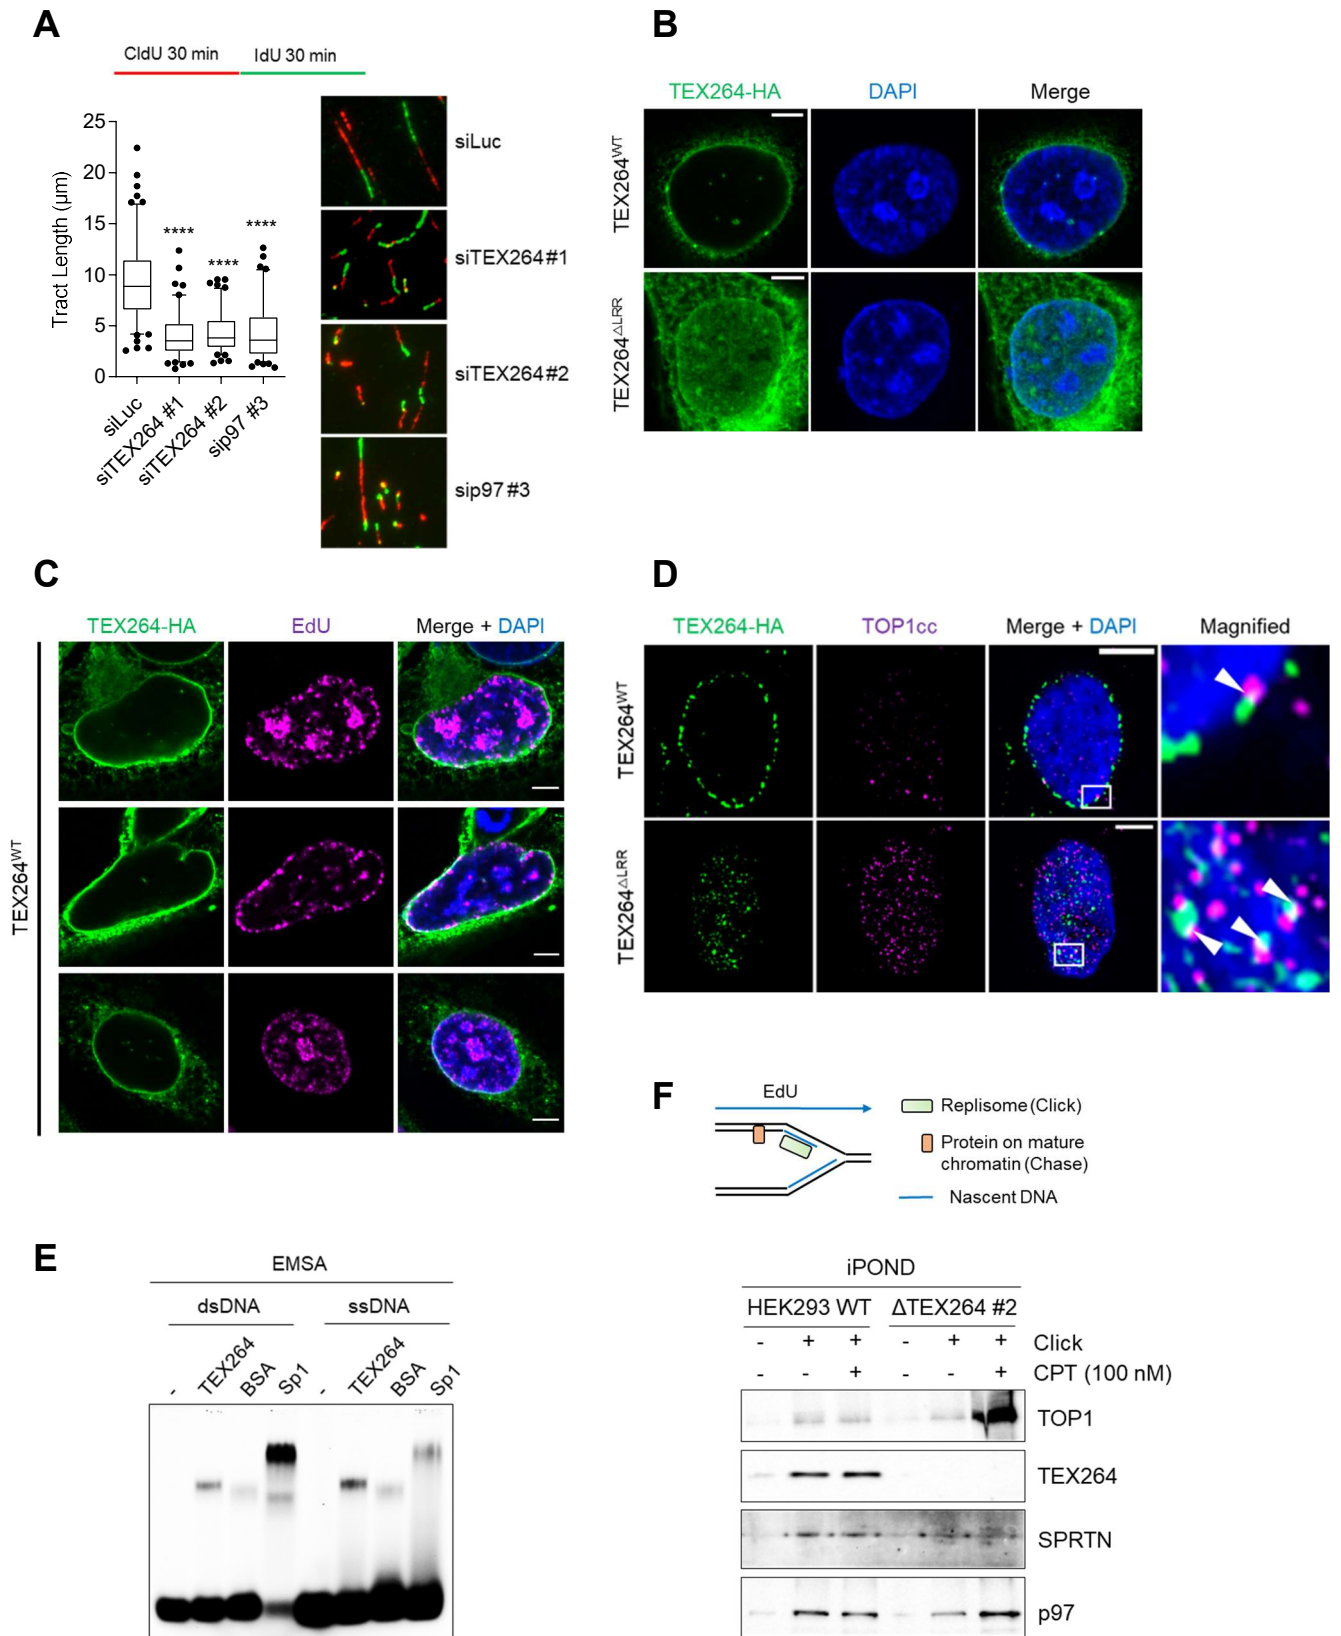

Supplementary Figure 7

### Supplementary Figure 7: TEX264 Acts at Replication Forks

**A**, DNA fibre analysis of replication fork velocity in HEK293 cells treated with the indicated siRNAs. IdU track lengths are shown. Whisker box plots show median values and data within the 5–95 percentile. At least 100 fibres were measured per condition ( $****P < 0.0001$ ; one-way ANOVA). Right: representative DNA fibres. **B**, Confocal images of U2OS cells transfected with the SSH-tagged TEX264 variants and stained with the indicated antibodies. Scale bar, 5  $\mu\text{m}$ . **C**, Confocal images of U2OS cells transfected with cDNA encoding SSH-tagged TEX264 and stained with an anti-HA antibody. Cells were treated with 10  $\mu\text{M}$  EdU for 30 minutes before fixation. EdU was labelled using a Click-iT™ Alexa Fluor imaging kit. Scale bars, 5  $\mu\text{m}$ . See also Fig. 6C. **D**, Deconvolved confocal images (maximum intensity projections; 11 x 200 nm slices) of U2OS cells transfected with SSH-tagged TEX264 variants and stained with indicated antibodies. White arrowheads indicate examples of co-localisation. **E**, Electrophoretic mobility shift analysis (EMSA) to test for TEX264-His binding to single-stranded (ss) and double-stranded (ds) DNA. Consensus sequence DNA probes for the transcription factor, Sp1, were used. Storage buffer (-) and BSA were used as negative controls. Sp1 was used as a positive control. **F**, Above: schematic diagram of iPOND. Below: immunoblots of iPOND experiment performed in WT and  $\Delta\text{TEX264}$  HEK293 cells. Where indicated cells were treated with CPT (100 nM) for a total of 1 hour. Source data are available online.

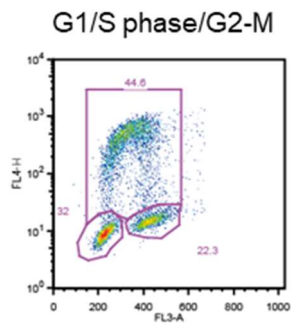

U2OS

**Supplementary Figure 8: Example of flow cytometry gating strategy for U2OS cells**

FACS plot showing the gating strategy of U2OS in G1, S phase, and G2-M phase.

**Supplementary Figure 8**



## Supplementary table 1 – Primers used in this study

| Primer                      | Sequence                                                                 | Purpose                                                |
|-----------------------------|--------------------------------------------------------------------------|--------------------------------------------------------|
| TEX264_E175A_F              | GCTGGAGATCTACCAGGACAGCCAGATCCATTTC                                       | Generation of TEX264 E175A variant                     |
| TEX264_E175A_R              | TGAATGGATCTGGTCTGCCGTGGTAGATCTCCAGC                                      |                                                        |
| TEX264_E194A_F              | ACTCTGTCCTCCTTATCAGCAGGCACATAGAACTCT                                     | Generation of TEX264 E194A variant                     |
| TEX264_E194A_R              | AGACTTCTATGTGCCTGCCATGAAGGACAGAGT                                        |                                                        |
| TEX264_E197A_F              | CCATTCCACTCTGTCGGCTTCACTCAGGCAC                                          | Generation of TEX264 E175A variant                     |
| TEX264_E197A_R              | GTGCCCTGAGATGAAGGCGACAGAGTGGAAATGG                                       |                                                        |
| TEX264_E199A_F              | CCCCGCCATTTCCACGCTGCTCCTTTCATCT                                          | Generation of TEX264 E199A variant                     |
| TEX264_E199A_R              | AGATGAAGGAGACAGCGTGGAAATGGCGGGG                                          |                                                        |
| TEX264_Y158A_F              | TCCTGCCTTGGACACCGCCATCAAGGAGCGGAAG                                       | Generation of TEX264 Y158A variant                     |
| TEX264_Y158A_R              | CTTCGGCTCCTTGGTGGCGGTGTCCTCAAGGCAGGA                                     |                                                        |
| TEX264_SIM1_round 1_F       | CTTGAAGCCAAATTTCTGGCGGAGGGGGGATGCCCTCAGGGGAGGGCGATTTC                    | Generation of TEX264 SIM1 variant                      |
| TEX264_SIM1_round 1_R       | GAATCGCCCTCCCTGAGGGCCATCGCCCTCGCCAGAAATTTGGCTTCAAG                       |                                                        |
| TEX264_SIM1_round 2_F       | CCAAATTTCTGGGCGGGCGGGCCGCTCAGGGGAGGG                                     |                                                        |
| TEX264_SIM1_round 2_R       | CCCTCCCTGAGGGCGCCGCGCCGCGCCAGAAATTTGG                                    |                                                        |
| TEX264_SIM2_F               | CAGGATGGACACGCGGGGTAGCCAGCGCGATGGCCAGAGCGGTGGTGTAGGGGAAAGGTGGCTGTC       |                                                        |
| TEX264_SIM2_R               | GACAGCCACTTCCCTACACCCCGCTTGGCCATCGCGCTGCTGCCATCGCGCTACCCGCCCGTGTCCATCCTG | Generation of TEX264 SIM2 variant                      |
| TEX264_SHPdeletion_F        | CAGCGGCTCCTCTGAGTCACGGCTGG                                               | Generation of TEX264 ΔSHP variant                      |
| TEX264_SHPdeletion_R        | CCAGCCGTGACTCAGAGGAGCCGCTG                                               |                                                        |
| TEX264_LRRdeletion_R        | AATTGCGGCCGCTCCTTGGCCCTTCTCAGGGG                                         | Generation of TEX264 ΔLRR variant                      |
| TEX264_LRRdeletion_F_pcDNA5 | ATATGGATCCATGGGGTACTCAGGGCTACTGGCTG                                      | Forward primer for pcDNA5<br>Forward primer for pET21a |
| TEX264_LRRdeletion_F_pET21a | AATTCATATGTCGGACCTGCTACTACTGG                                            |                                                        |
| p97_200STOP_F               | CATCATAGCCTACTTAATTTAAGGACTCCTCCTCATCCTC                                 | Generation of truncated p97 variant                    |
| p97_200STOP_R               | GAGGATGAGGAGGATCCTTAAATTAAGTAGGCTATGATG                                  |                                                        |

## Supplementary table 2 – siRNAs used in this study

| <b>siRNA</b>   | <b>Sequence</b>       |
|----------------|-----------------------|
| siLuc          | CGUACGCGGAAUACUUCGA   |
| sip97 #1       | AAGUAGGGUAUGAUGACAUUG |
| sip97 #2       | AAGAUGGAUCUCAUUGACCUA |
| sip97 #3       | AACAGCCAUUCUCAACAGAA  |
| siTEX264 #1    | CTCATCGACCTCTACCAGAAA |
| siTEX264 #2    | CGGCTGGAGATCTACCAGGAA |
| siTEX264 3'UTR | CUUCCAGGACCCAGAAUAA   |
| siTOP1         | GGUCCUGUUGAGAAACGA    |
| siTDP1         | GGAUAUUGCGUUUGGAACA   |
| siUBC9         | GUGGCUGUCCCAACAAAAA   |
| siSPRTN #1     | AGCCAAUUAACGGUUAUACCA |
| siSPRTN 3'UTR  | GUCAGGAAGUUCUGGUUAA   |

### Supplementary table 3 – Antibodies used in this study

| Antibody                                                                       | Dilutions | Source                       | Identifier                          |
|--------------------------------------------------------------------------------|-----------|------------------------------|-------------------------------------|
| HA [clone 3F10] (rat monoclonal)                                               | 1:5000    | Roche                        | 3F10; RRID:AB_2314622               |
| PCNA (mouse monoclonal)                                                        | 1:2000    | Abcam                        | ab29; RRID:AB_303394                |
| p97 (rabbit polyclonal)                                                        | 1:1000    | Proteintech                  | 10736-1-AP;<br>RRID:AB_2214635      |
| p97 (rabbit polyclonal)                                                        | 1:1000    | In house                     | N/A                                 |
| Topoisomerase 1 (rabbit polyclonal)                                            | 1:5000    | Bethyl Laboratories          | A302-589A;<br>RRID:AB_2034865       |
| Topoisomerase I-DNA Covalent Complexes Antibody, clone 1.1A (mouse monoclonal) | 1:100     | Millipore                    | MABE1084; ;<br>RRID:AB_2756354      |
| TEX264 (rabbit polyclonal)                                                     | 1:1000    | In house                     | N/A                                 |
| TEX264 (mouse monoclonal)                                                      | 1:1000    | Novus                        | H00051368-M01; ;<br>RRID:AB_2255844 |
| Vinculin (mouse monoclonal)                                                    | 1:2000    | Bethyl Laboratories          | ab18058; RRID:AB_444215             |
| FLAG (rabbit polyclonal)                                                       | 1:2000    | Sigma-Aldrich                | F7425; RRID:AB_439687               |
| myc (mouse monoclonal)                                                         | 1:1000    | Cell Signaling Technology    | 2276; RRID:AB_331783                |
| Double-stranded DNA (mouse monoclonal)                                         | 1:5000    | Abcam                        | ab27156; RRID:AB_470907             |
| SUMO1 (rabbit polyclonal)                                                      | 1:1000    | Abcam                        | ab11672; RRID:AB_298480             |
| SUMO2/3 , clone 18H8 (rabbit monoclonal)                                       | 1:1000    | Cell Signaling Technology    | 4971; RRID:AB_2198425               |
| SPRTN N-terminal (rabbit polyclonal)                                           | 1:1000    | In house; Lessel et.al, 2014 | N/A                                 |
| SPRTN C-terminal (rabbit polyclonal)                                           | 1:1000    | Atlas                        | HPA025073                           |
| GFP                                                                            | 1:2000    | Abcam                        | ab290; RRID:AB_303395               |
| POLD1 (mouse monoclonal)                                                       | 1:1000    | Abcam                        | ab10362; RRID:AB_297099             |
| MCM7 (141.2) (mouse monoclonal)                                                | 1:1000    | Santa Cruz Biotechnology     | sc-9966; RRID:AB_627235             |
| TDP1 (rabbit polyclonal)                                                       | 1:1000    | Abcam                        | ab4166; RRID:AB_304337              |
| Mono- and polyubiquitinated conjugates, mAb (FK2)                              | 1:1000    | Enzo Life Sciences           | BML-PW8810;<br>RRID:AB_10541840     |
| Tubulin (mouse monoclonal)                                                     | 1:5000    | Sigma-Aldrich                | T6199; RRID:AB_477583               |
| Histone H2A.X, phospho (Ser139; rabbit polyclonal)                             | 1:200     | Novus                        | NB 100-2280,<br>RRID:AB_577933      |
| Rabbit IgG, HRP-conjugated (goat polyclonal)                                   | 1:25,000  | Sigma-Aldrich                | A9169; RRID:AB_258434               |
| Mouse IgG, HRP-conjugated (rabbit polyclonal)                                  | 1:25,000  | Sigma-Aldrich                | A9044; AB_258431                    |
| Mouse IgG, Alexa Fluor 488 (goat polyclonal)                                   | 1:500     | Molecular Probes             | A-11001; RRID:AB_2534069            |
| Rabbit IgG, Alexa Fluor 594 (donkey polyclonal)                                | 1:500     | Thermo Fisher Scientific     | R37119; RRID:AB_2556547             |
| Mouse IgG, Alexa Fluor 488                                                     | 1:500     | Thermo Fisher Scientific     | R37114; AB_2556542                  |
| Rat IgG, Cy3-AffinityPureF(ab') <sub>2</sub> Fragment (donkey polyclonal)      | 1:300     | Jackson ImmunoResearch Labs  | 712-166-153;<br>RRID:AB_2340669     |
| beta Actin (mouse monoclonal)                                                  | 1:2000    | Thermo Fisher Scientific     | AM4302, RRID:AB_2536382             |
| BrdU [clone BU1/75(ICR1)] (rat monoclonal)                                     | 1:500     | Abcam                        | ab6326; RRID:AB_305426              |
| BrdU [clone B44] (mouse monoclonal)                                            | 1:500     | BD Biosciences               | 347580; RRID:AB_400326              |
